# Supplementary material for: Design of fluorescent polymeric thermometers based on anthrapyrazolone functionalized oligo(ethylene glycol) methacrylates
Source: Royal Society of Chemistry journal article supplement (doi:10.1039/d3qm00019b), 2023-01-01
Supplement: d3qm00019b1.pdf [file d3qm00019b1.pdf]

***Supporting information for:***

**Design of fluorescent polymeric thermometers based on anthrapyrazolone functionalized oligo(ethylene glycol) methacrylates**

S. Saravanan,<sup>#a</sup> Anashwara Babu,<sup>#a</sup> Ronald Merckx,<sup>b</sup> Zifu Zhong,<sup>c</sup> Mageshwari Anandan,<sup>a</sup> Venkatramaiah Nutalapati,<sup>a</sup> Bruno G. De Geest,<sup>c</sup> Richard Hoogenboom,<sup>\*b</sup> Valentin Victor Jerca,<sup>\*d</sup> Samarendra Maji,<sup>\*a</sup>

<sup>a</sup>Department of Chemistry, SRM Institute of Science and Technology, Kattankulathur 603203, Kanchipuram, Tamil Nadu, India **E-mail:** [samarenr@srmist.edu.in](mailto:samarenr@srmist.edu.in)

<sup>b</sup>Supramolecular Chemistry Group, Centre of Macromolecular Chemistry (CMaC), Department of Organic and Macromolecular Chemistry, Ghent University, Krijgslaan 281 S4, Ghent, Belgium **E-mail:** [richard.hoogenboom@ugent.be](mailto:richard.hoogenboom@ugent.be)

<sup>c</sup>Faculty of Pharmaceutical Sciences, Department of Pharmaceutics, Ghent University, Ottergemsesteenweg 460, 9000 Ghent, Belgium

<sup>d</sup>Smart Organic Materials Group, "Costin D. Nenitzescu" Institute of Organic and Supramolecular Chemistry of the Romanian Academy, Spl. Independentei 202B, Bucharest, Romania **E-mail:** [victor.jerca@ccocdn.ro](mailto:victor.jerca@ccocdn.ro)

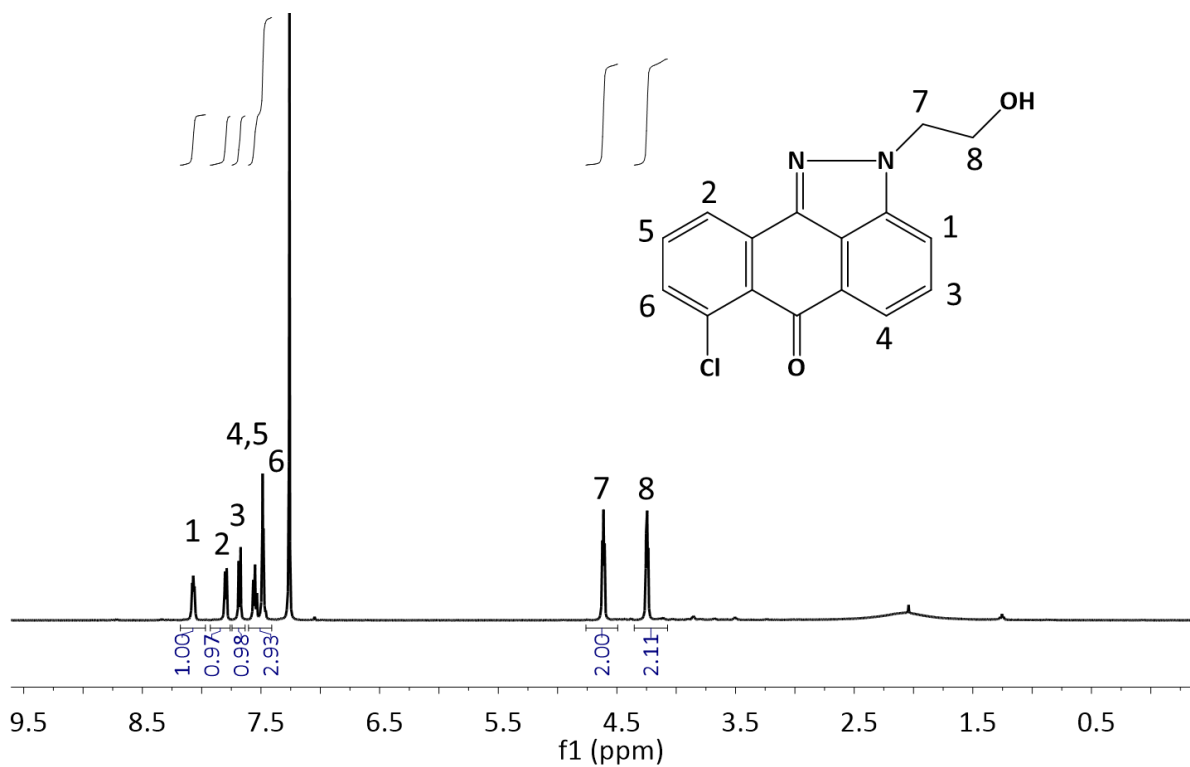

Figure S1. <sup>1</sup>H NMR spectrum of 7-chloro-2-(2-hydroxyethyl)dibenzo[cd,g]indazol-6(2H)-one

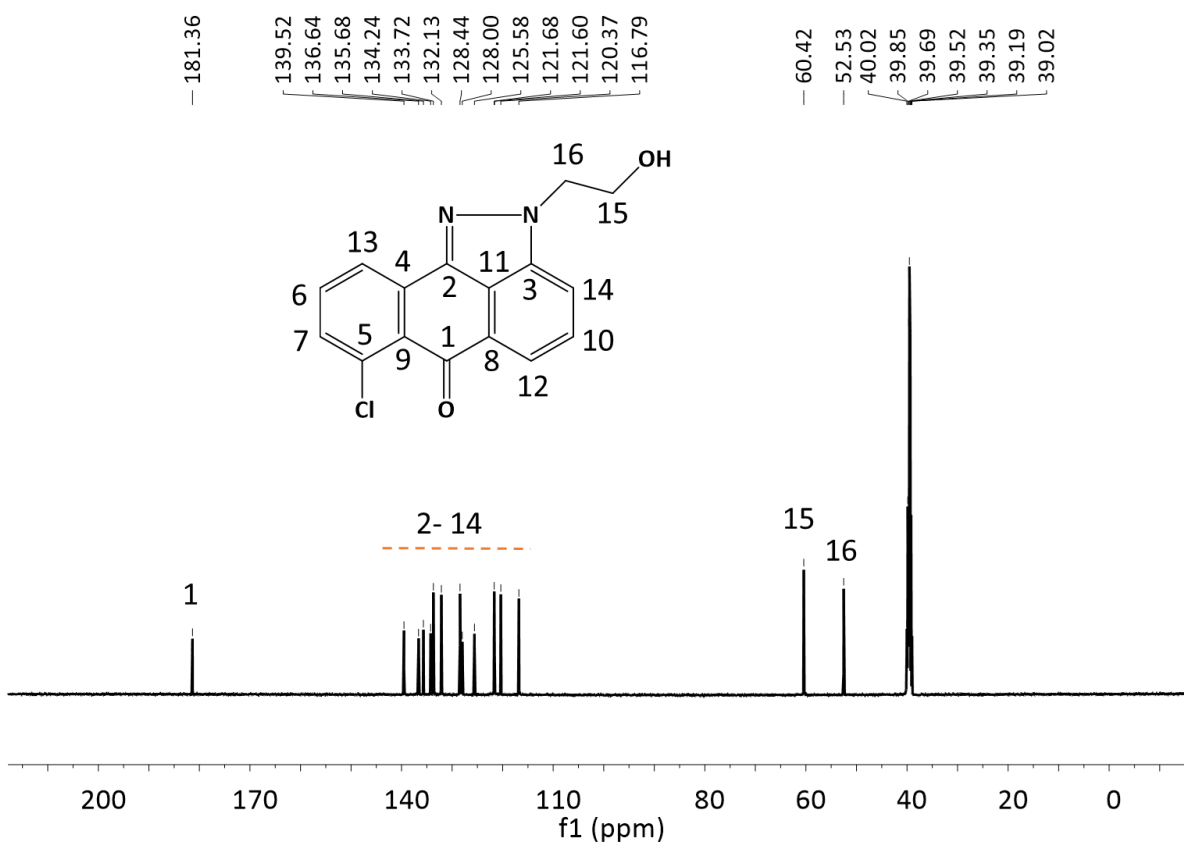

Figure S2. <sup>13</sup>C NMR spectrum of 7-chloro-2-(2-hydroxyethyl)dibenzo[cd,g]indazol-6(2H)-one

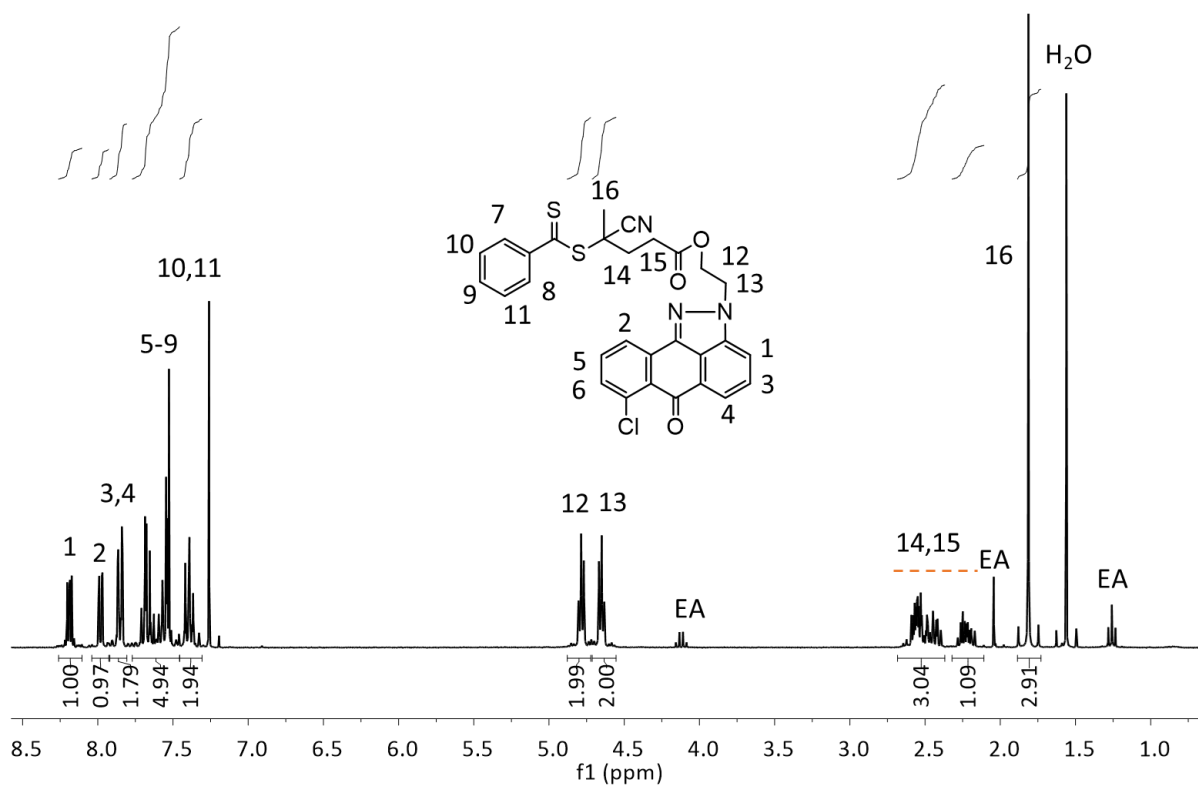

Figure S3.  $^1\text{H}$  NMR spectrum of RAFT-Dye ester (powder) measured in  $\text{CDCl}_3$ . Ethyl acetate (EA) is present as impurity.

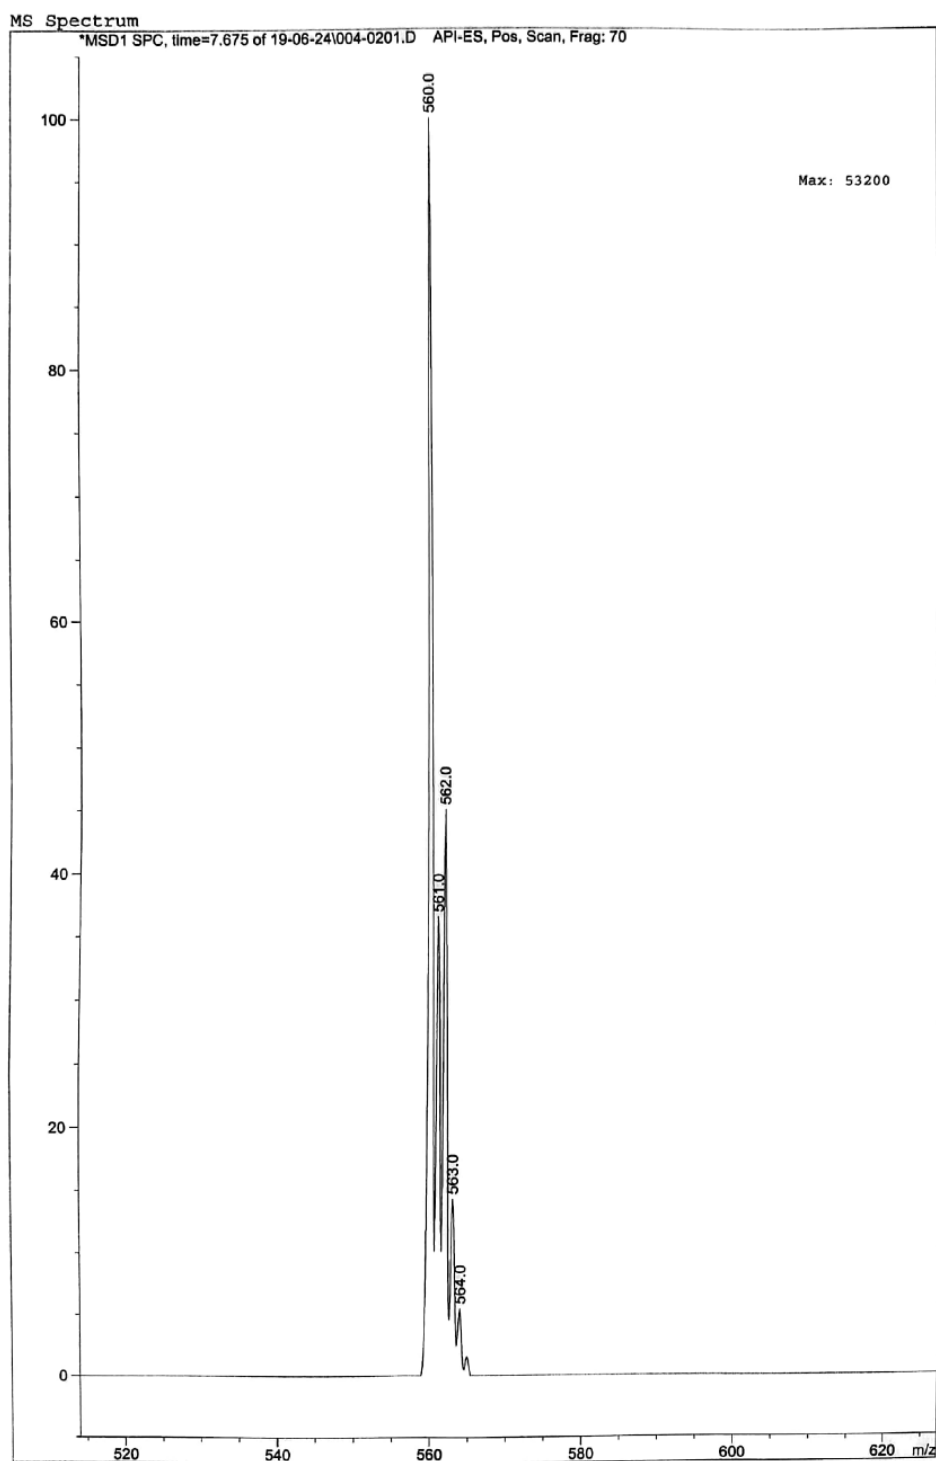

Figure S4. LC MS of RAFT CTA

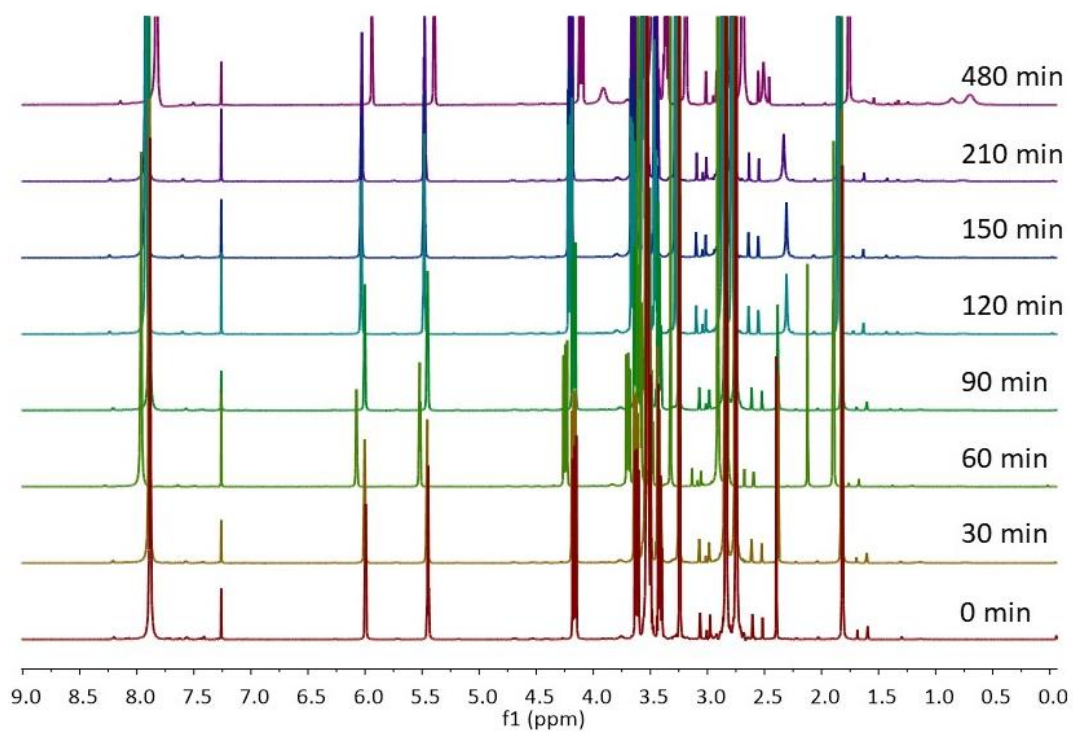

Figure S5.  $^1\text{H}$  NMR spectra was recorded in  $\text{CDCl}_3$  during the RAFT homo-polymerization of OEGMA<sub>300</sub> at 70 °C.

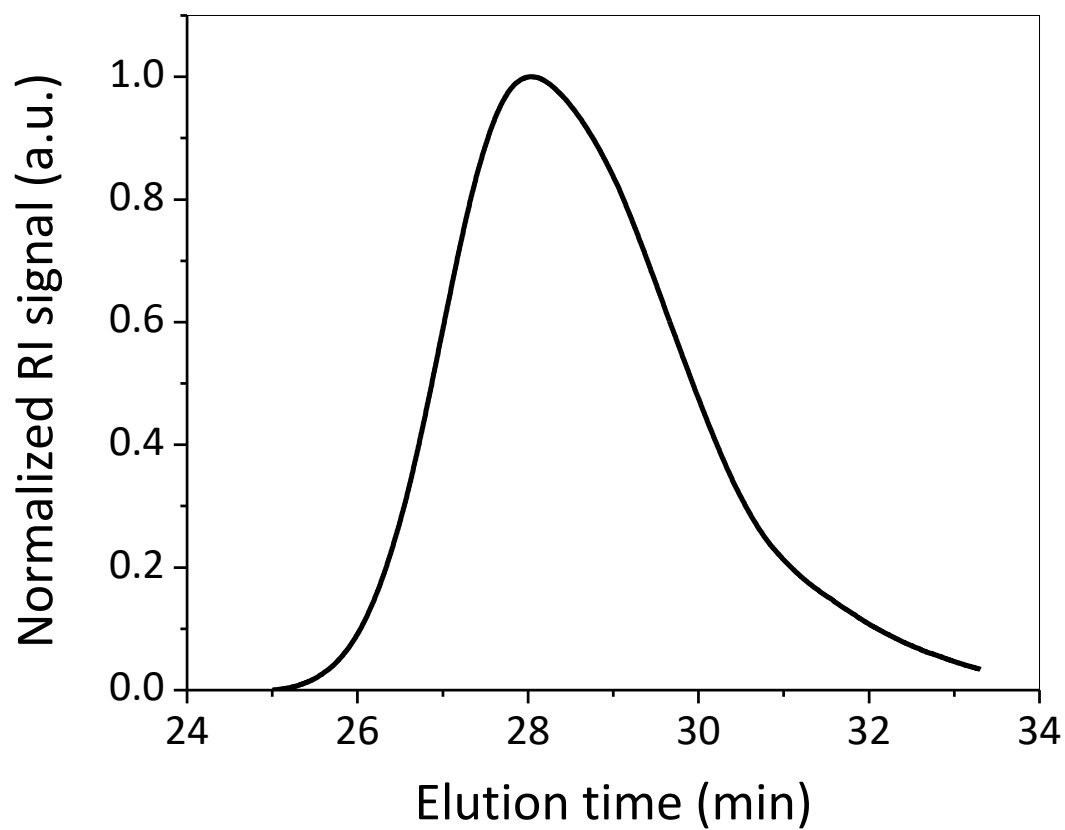

Figure S6. SEC trace of the final sample of POEGMA<sub>300</sub> measured in DMAc containing  $50 \times 10^{-3}$  M of LiCl at 50 °C at a flow rate of 0.500 mL/min.

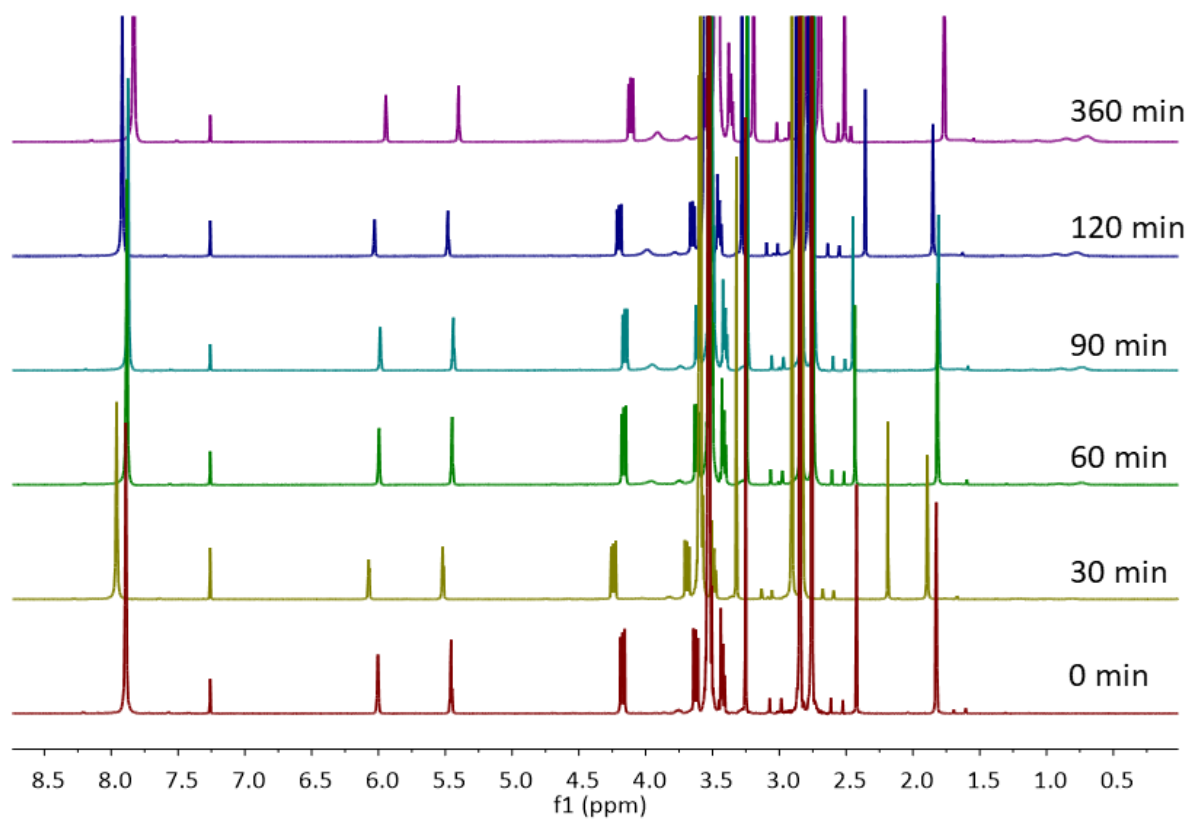

Figure S7.  $^1\text{H}$  NMR spectra was recorded in  $\text{CDCl}_3$  during the RAFT homo-polymerization of OEGMA<sub>500</sub> at 70 °C.

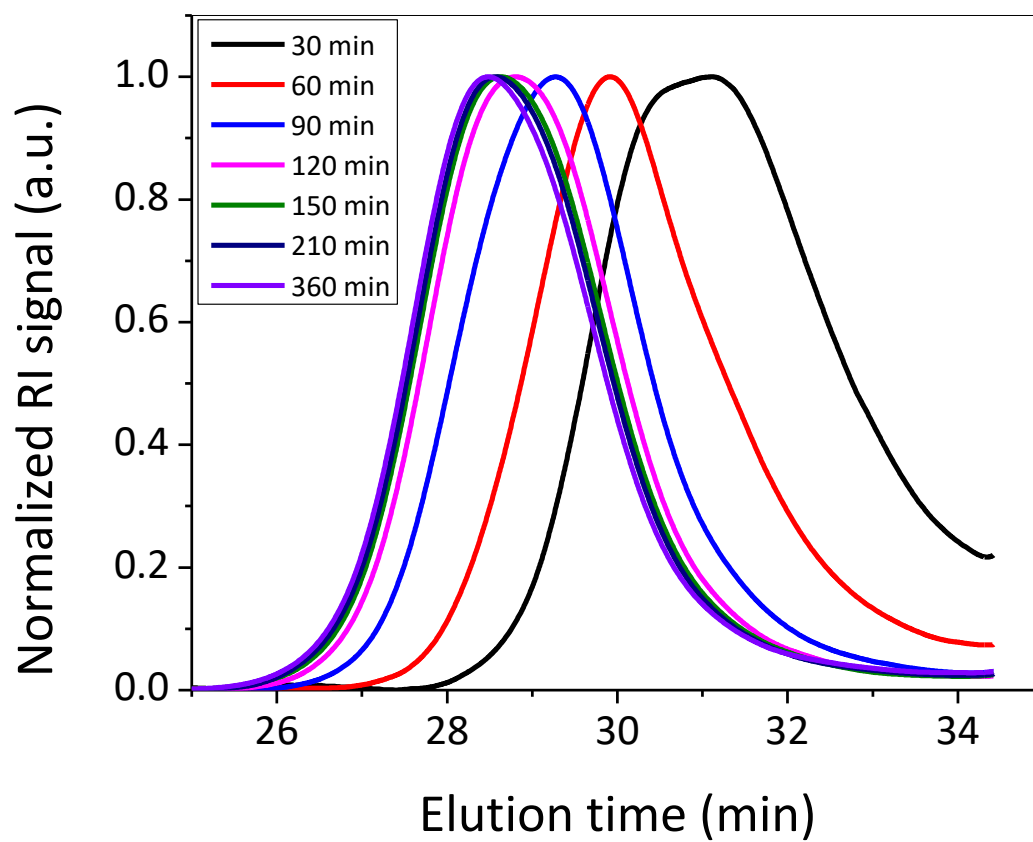

Figure S8. Overlay of SEC traces of POEGMA<sub>500</sub> measured in DMAc containing  $50 \times 10^{-3}$  M of LiCl at 50 °C at a flow rate of 0.500 mL/min.



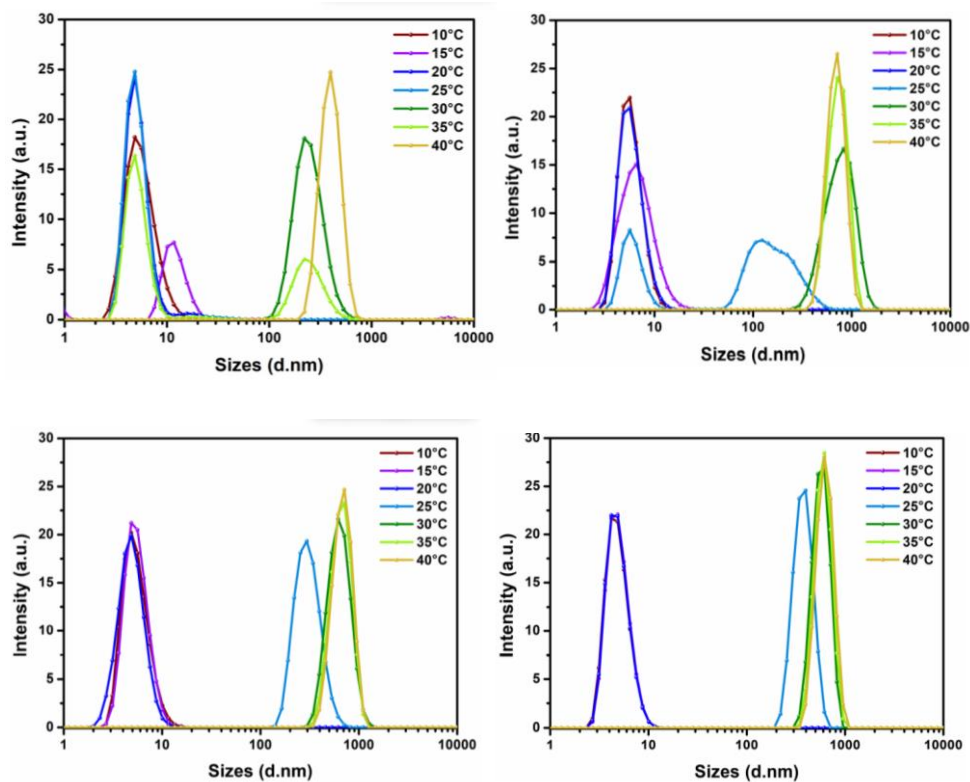

Figure S9. DLS results in water as a function of temperature for P(MEO<sub>2</sub>MA). The polymer concentration was top (left) 0.5 and (right) 1 mg/mL; bottom (left) 2 and (right) 3 mg/mL respectively.

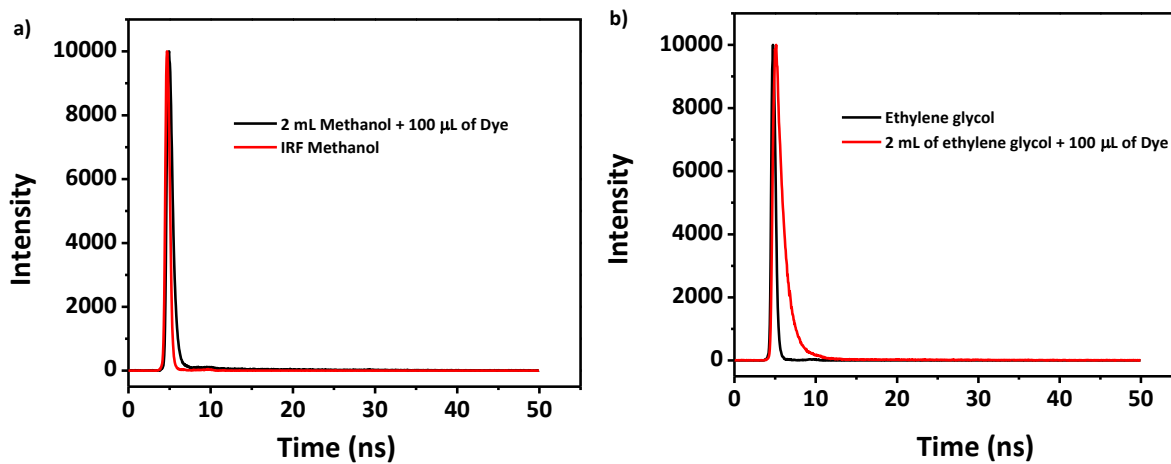

Figure S10. Fluorescence Lifetime decay of Cl-Dye-OH in a) methanol and b) ethylene glycol.

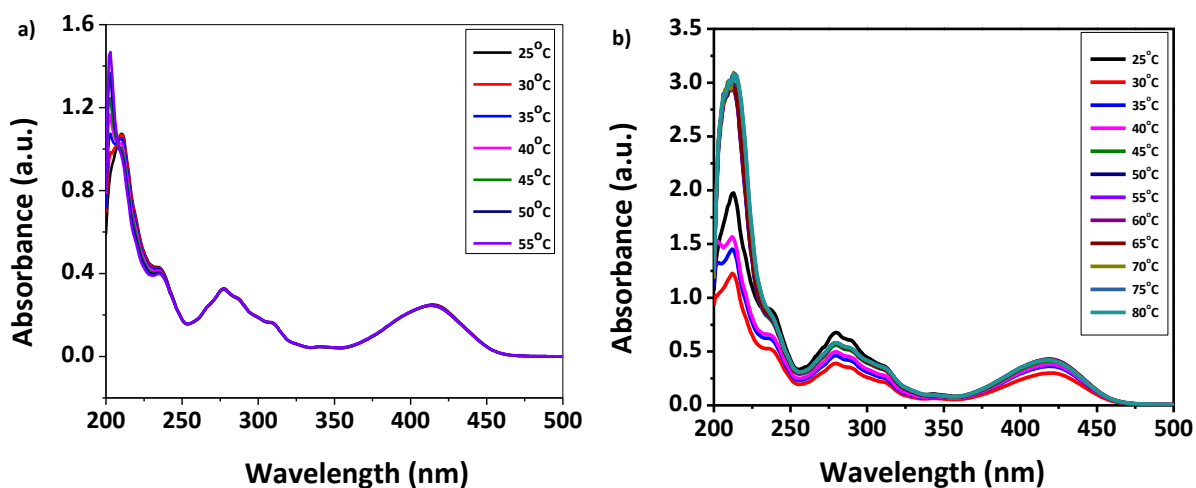

Figure S11. Absorption spectra of Cl-Dye-OH (0.99  $\mu\text{mol}$ ) in a) Methanol and b) ethylene glycol as a function of temperature.

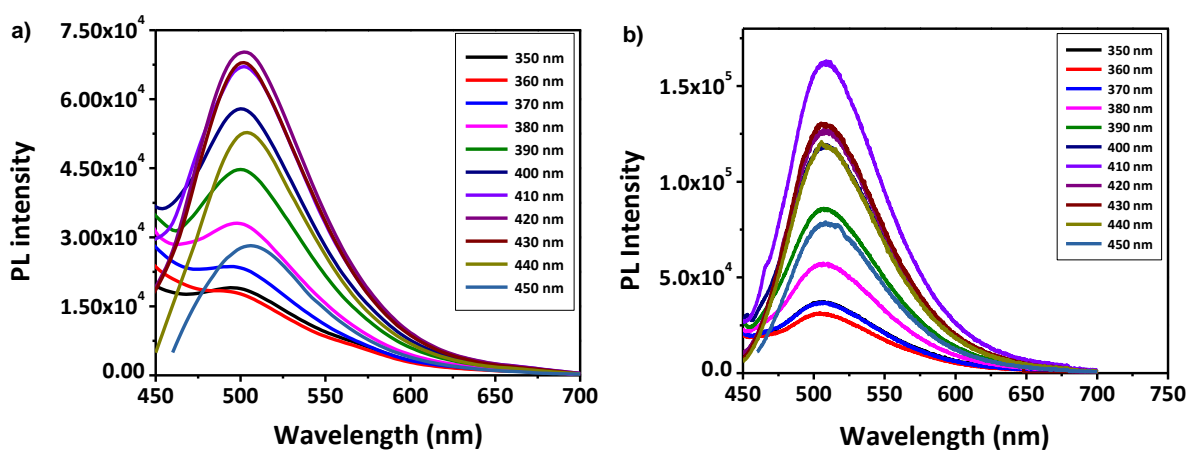

Figure S12. Fluorescence spectra of Cl-Dye-OH (0.1  $\mu\text{mol}$ ) in a) Methanol and b) in ethylene glycol and the emission at different excitation wavelength (350-450 nm).

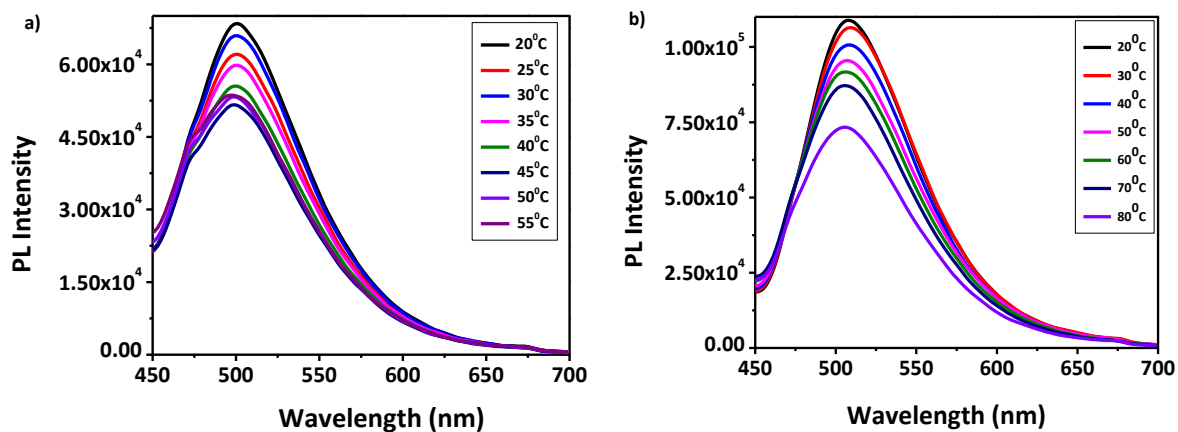

Figure S13. Fluorescence spectra (excitation wavelength 415 nm) of Cl-Dye-OH (0.1  $\mu\text{mol}$ ) in a) Methanol and b) ethylene glycol as a function of temperature.

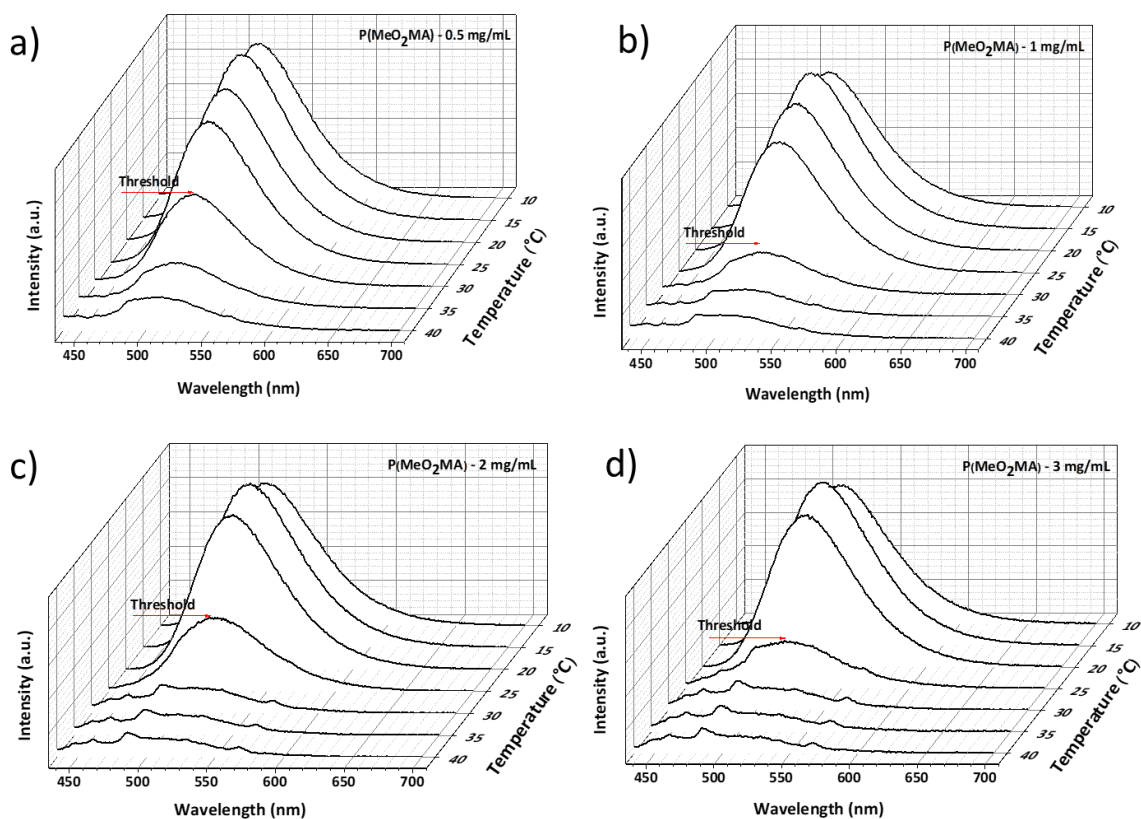

Figure S14. Fluorescence spectra in DW as a function of temperature for MEO<sub>2</sub>MA. The polymer concentration was a) 0.5 mg/mL; b) 1 mg/mL; c) 2 and d) 3 mg/mL and the excitation wavelength were 415 nm, respectively.

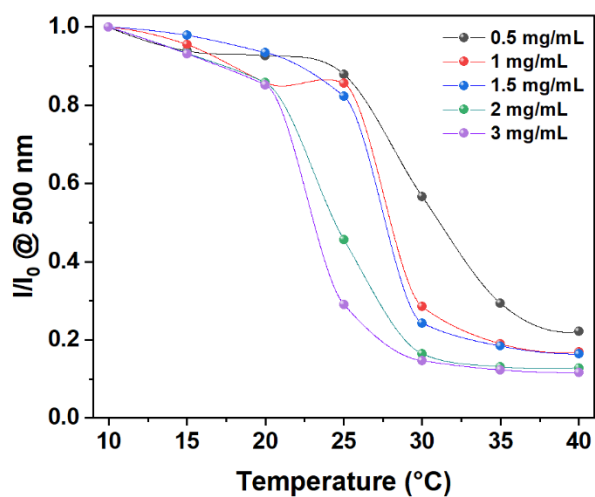

Figure S15. The  $I/I_0$  ratio of emission intensities as function of temperature for P(MEO<sub>2</sub>MA) at different polymer concentrations.

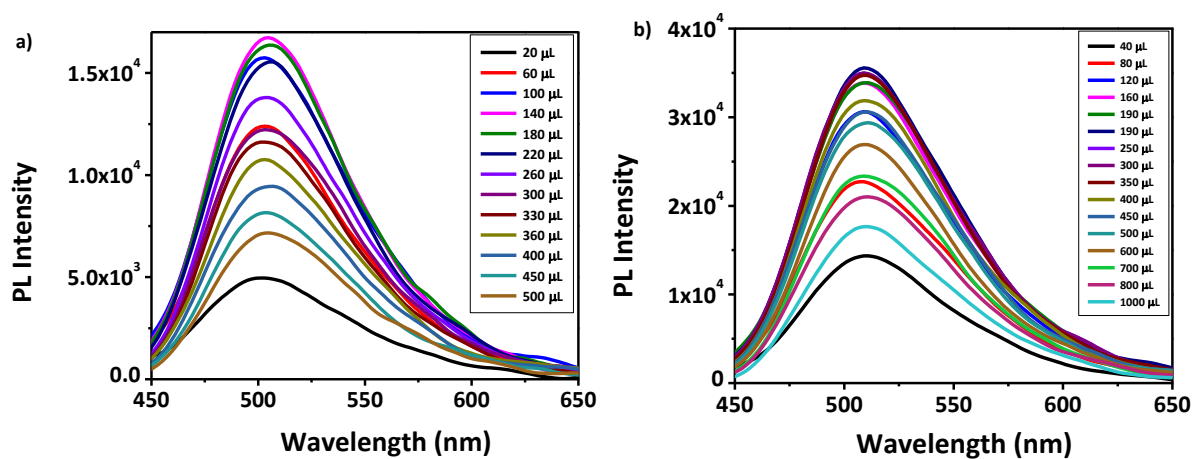

Figure S16. Fluorescence spectra (excitation wavelength 415 nm) of Cl-Dye-OH in a) Methanol and b) ethylene glycol at different concentration.
